# Supplementary material
Source: publisher figshare collection journal article supplement (https://future-science-group.figshare.com/articles/dataset/_/22829141)

(A) Corticosteroids (BUC only,  $n = 104$ )

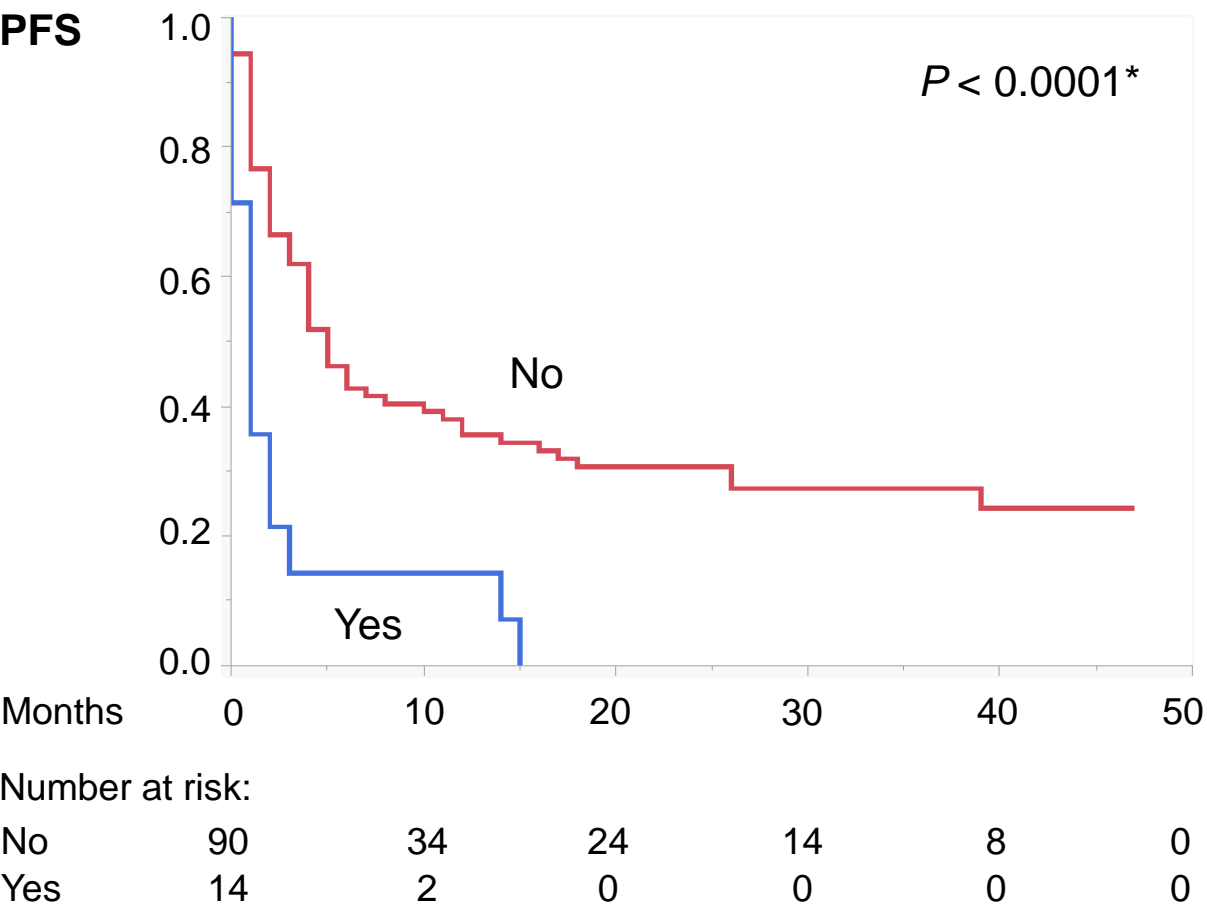

(B) Corticosteroids (BUC only,  $n = 104$ )

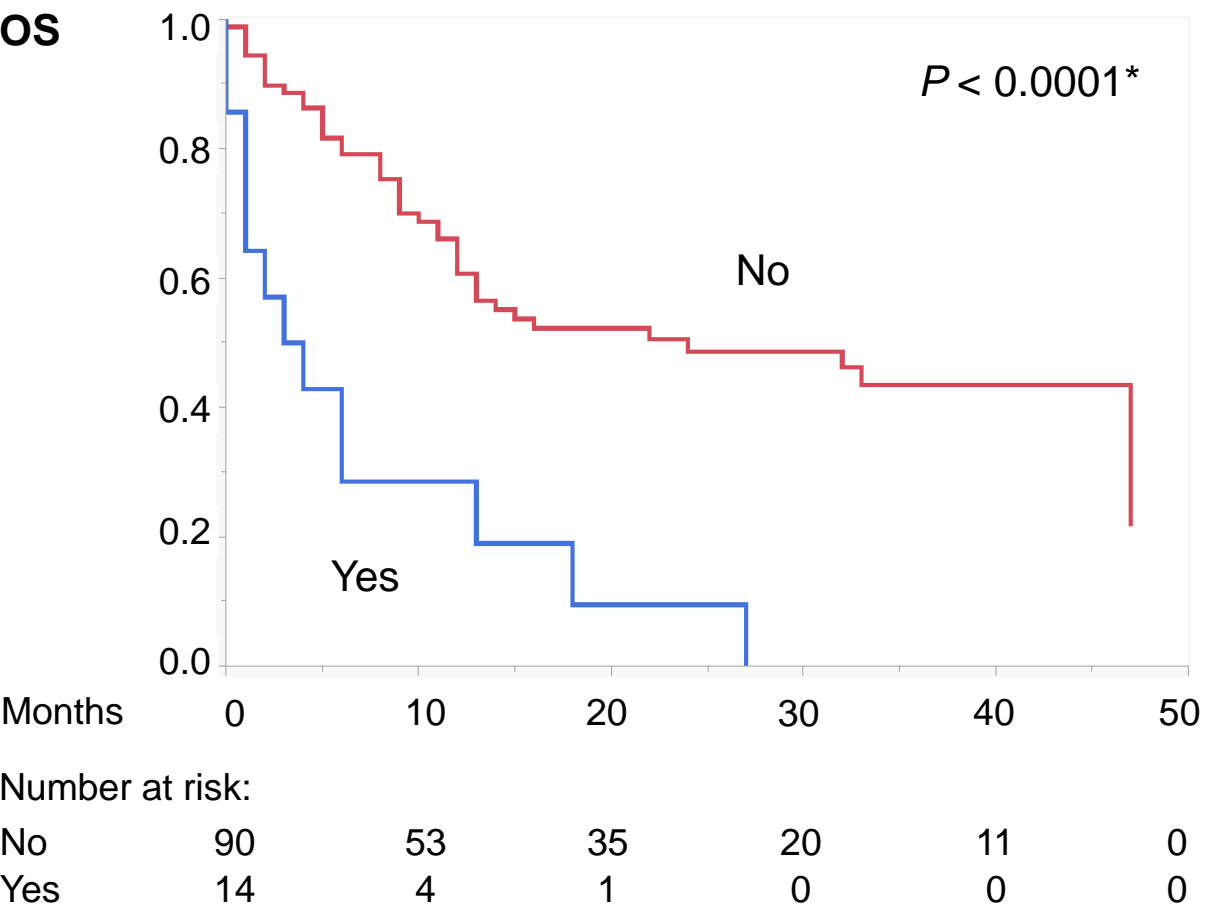

(C) Corticosteroids (UTUC or both,  $n = 138$ )

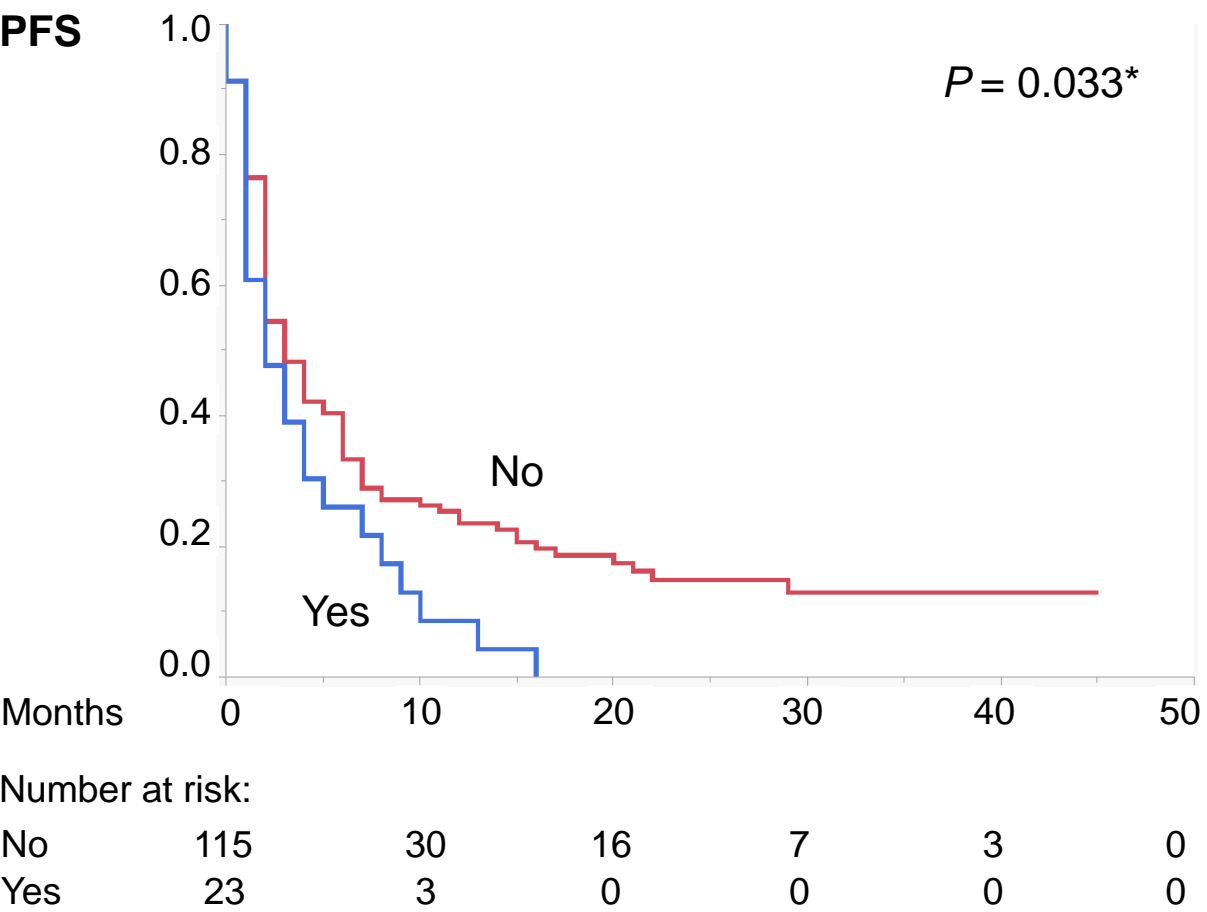

(D) Corticosteroids (UTUC or both,  $n = 138$ )

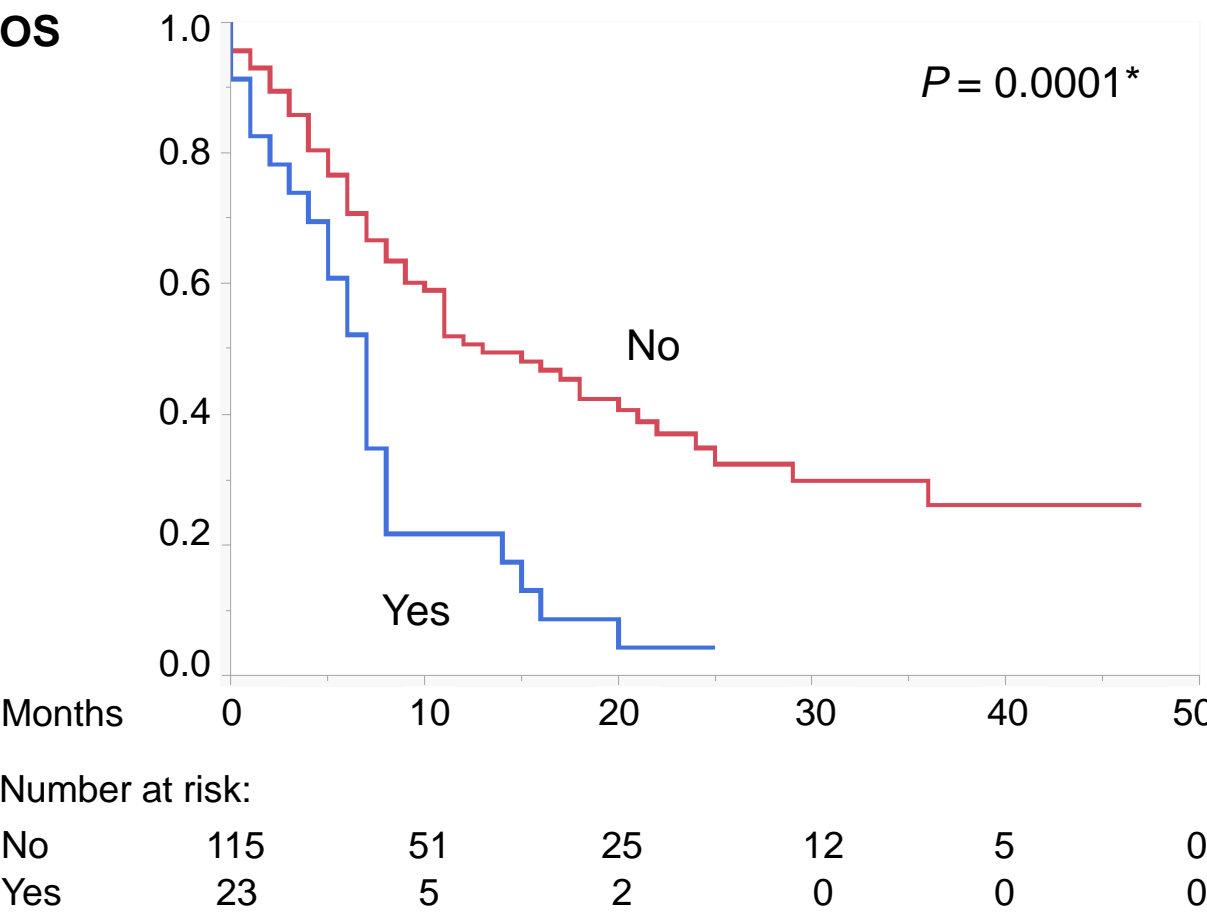

Supplement: Supplementary file 2 [file 1]
