# Supplementary material
Source: publisher figshare collection journal article supplement (https://future-science-group.figshare.com/articles/dataset/_/22829141)

(A) Antibiotics (BUC only,  $n = 104$ )

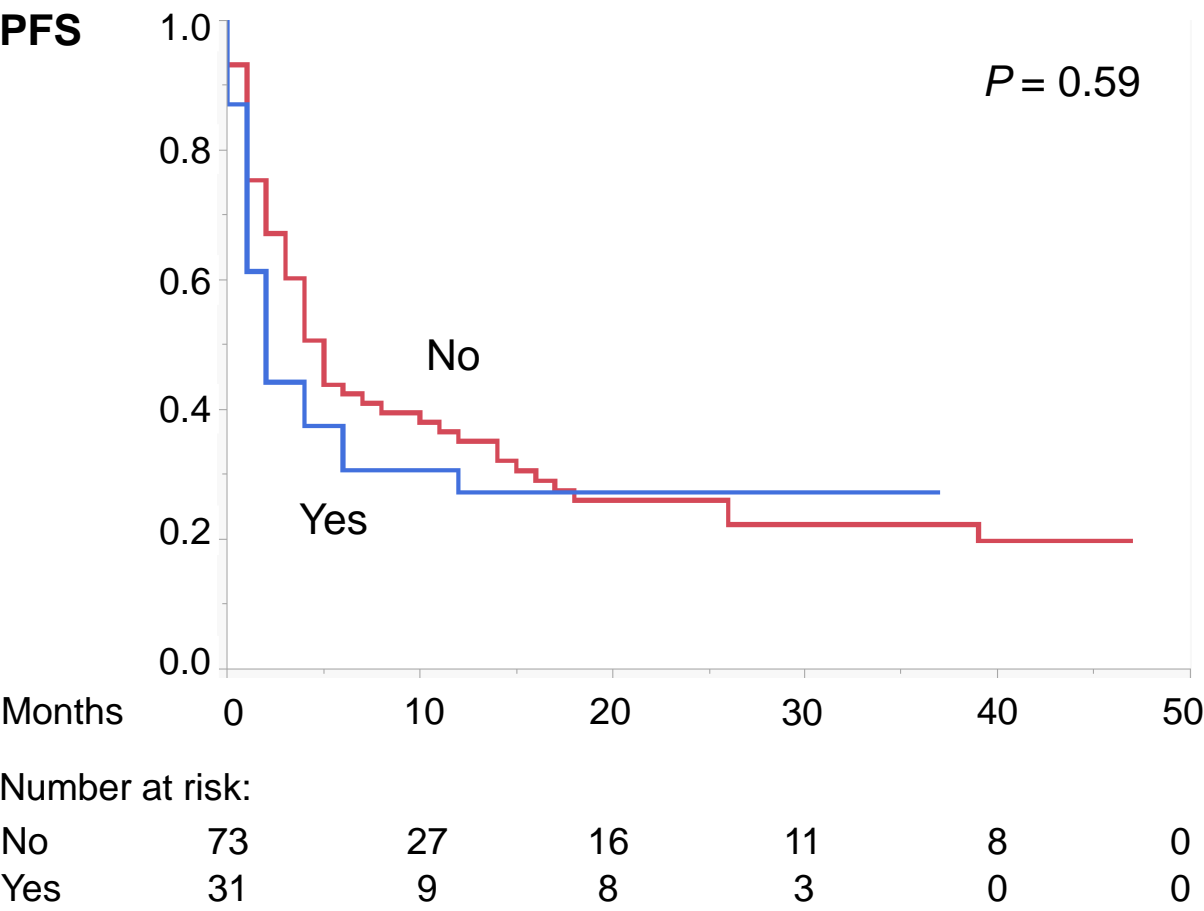

(B) Antibiotics (BUC only,  $n = 104$ )

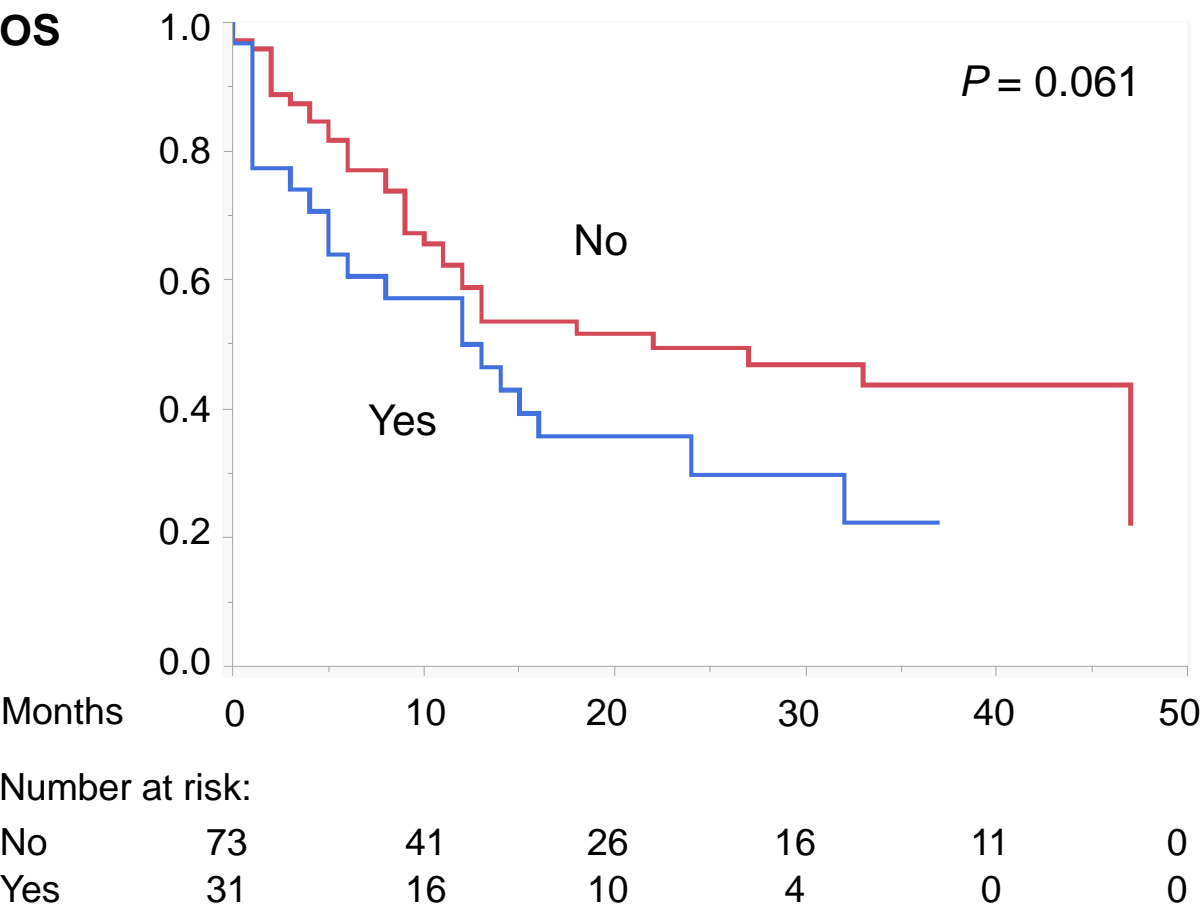

(C) Antibiotics (UTUC or both,  $n = 138$ )

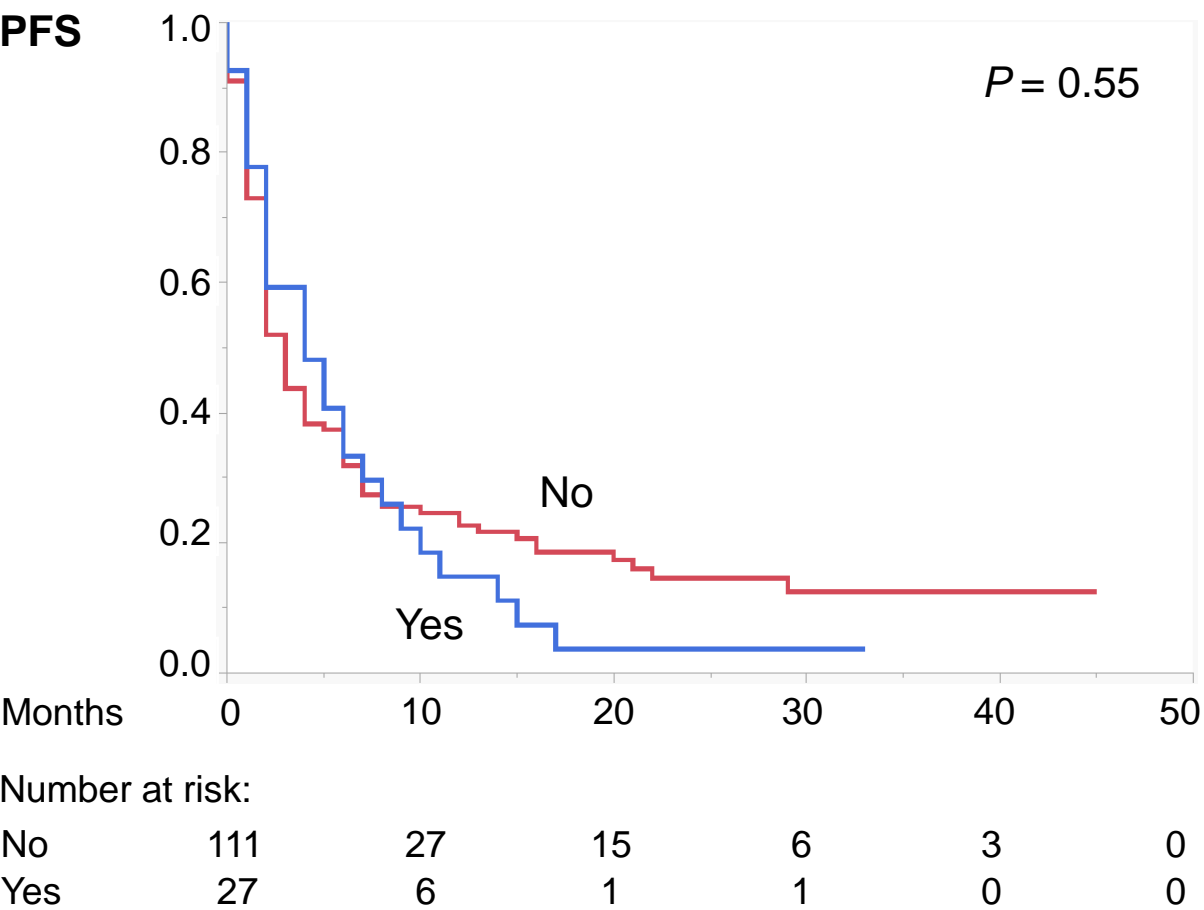

(D) Antibiotics (UTUC or both,  $n = 138$ )

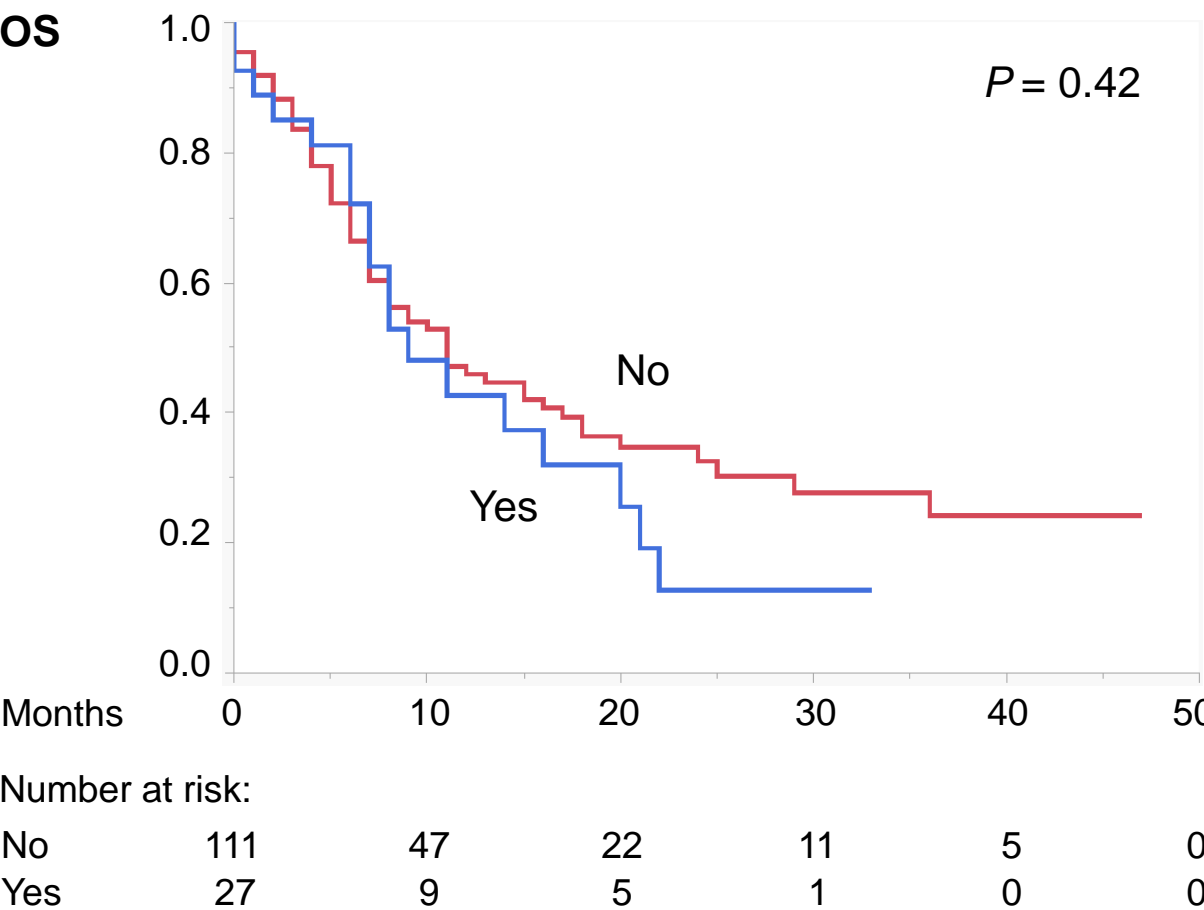

Supplement: Supplementary file 3 [file 1]
