# Supplementary material
Source: publisher figshare collection journal article supplement (https://future-science-group.figshare.com/articles/dataset/_/22829141)
Supplement: Supplementary file 5 [file 1]

(A) Primary cancer site

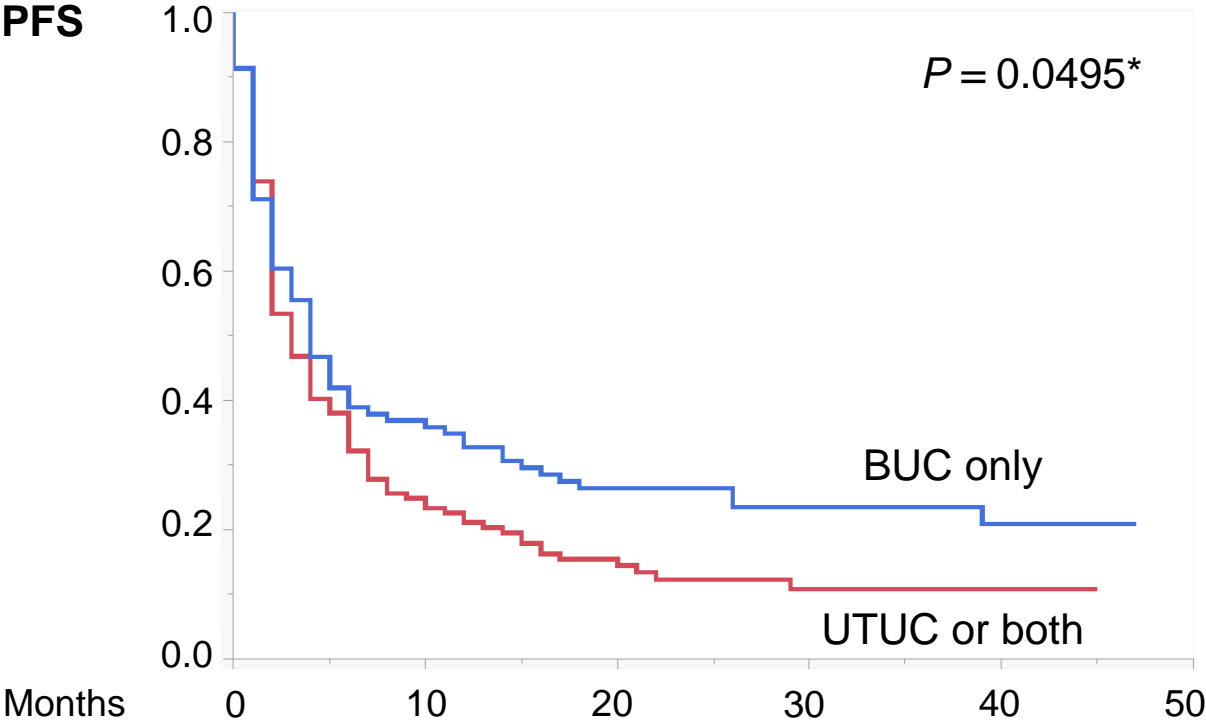

Number at risk:

|              |     |    |    |    |   |   |
|--------------|-----|----|----|----|---|---|
| BUC only     | 104 | 36 | 24 | 14 | 8 | 0 |
| UTUC or both | 138 | 33 | 16 | 7  | 3 | 0 |

(B) Primary cancer site

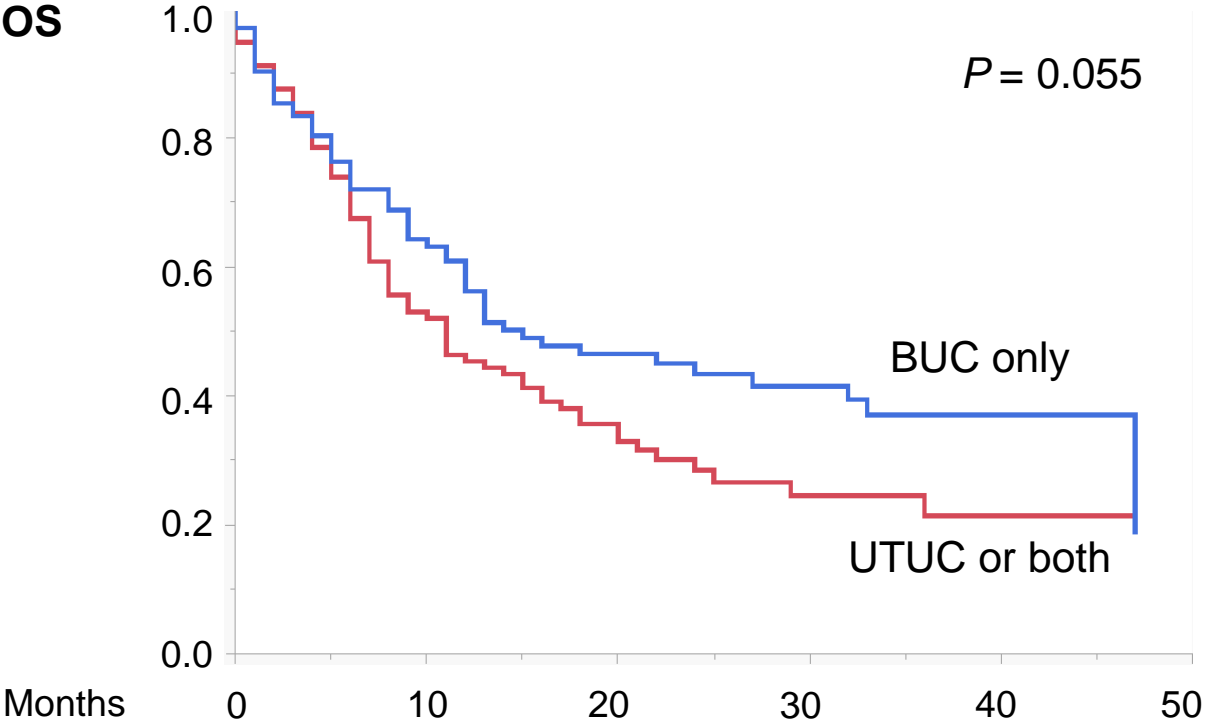

Number at risk:

|              |     |    |    |    |    |   |
|--------------|-----|----|----|----|----|---|
| BUC only     | 104 | 57 | 36 | 20 | 11 | 0 |
| UTUC or both | 138 | 56 | 27 | 12 | 5  | 0 |
