# Supplementary material
Source: publisher figshare collection journal article supplement (https://future-science-group.figshare.com/articles/dataset/_/22829141)

(A) Antibiotics

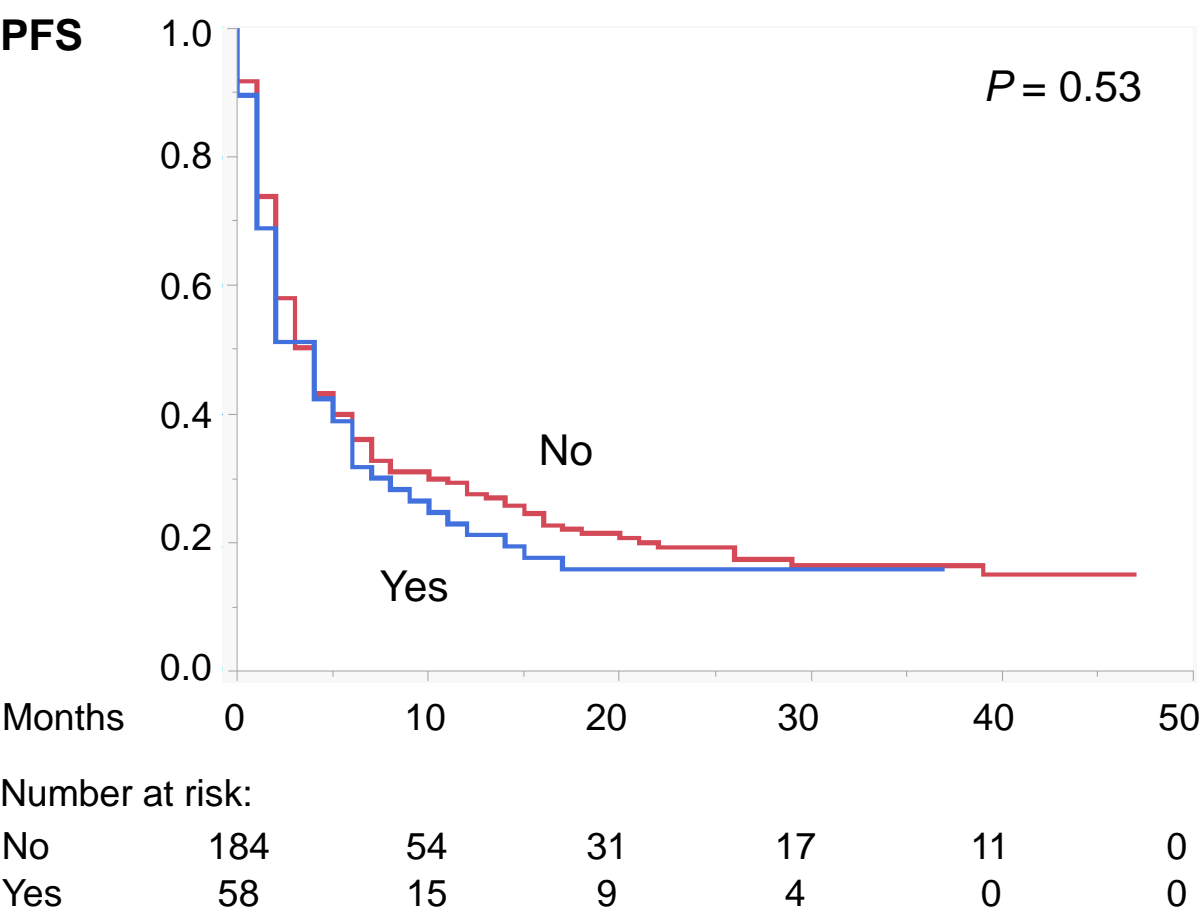

(B) Antibiotics

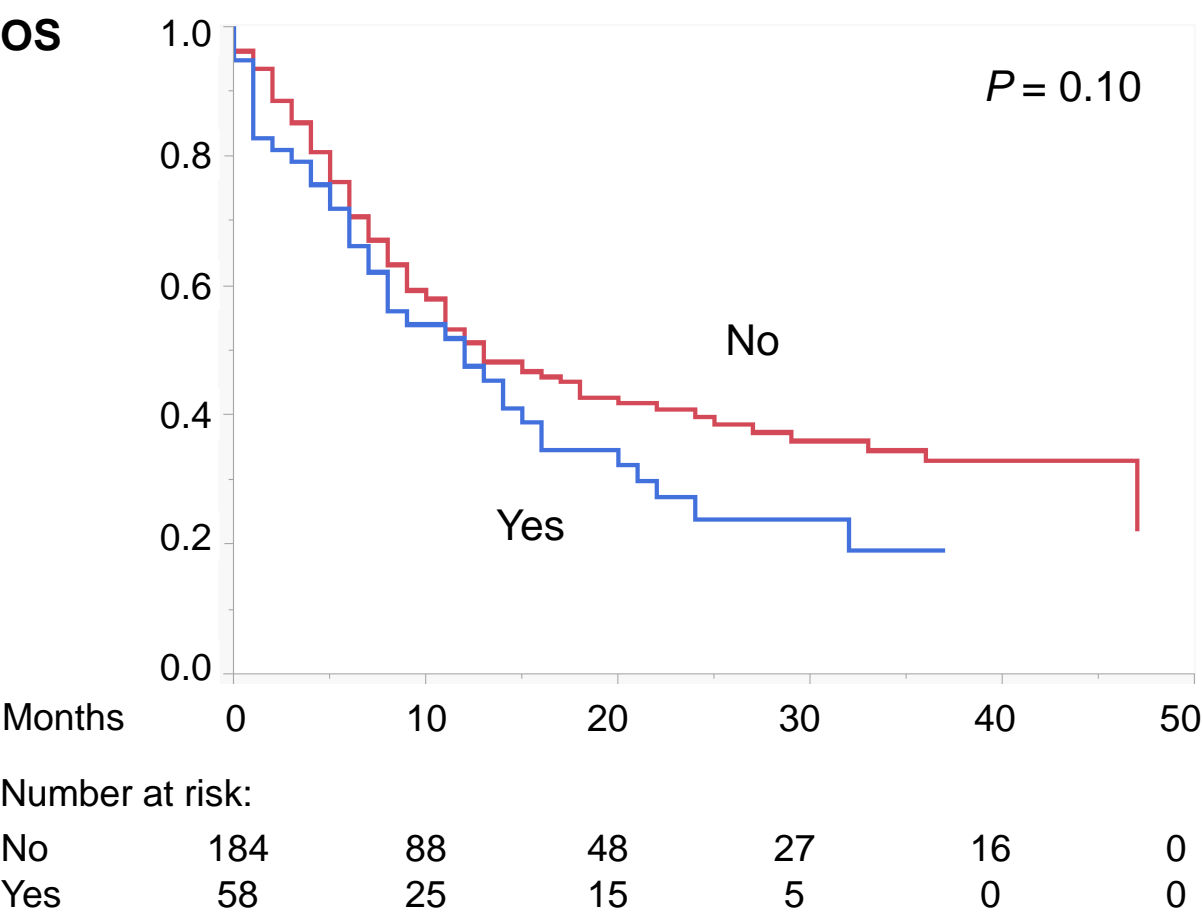

(C) PPIs

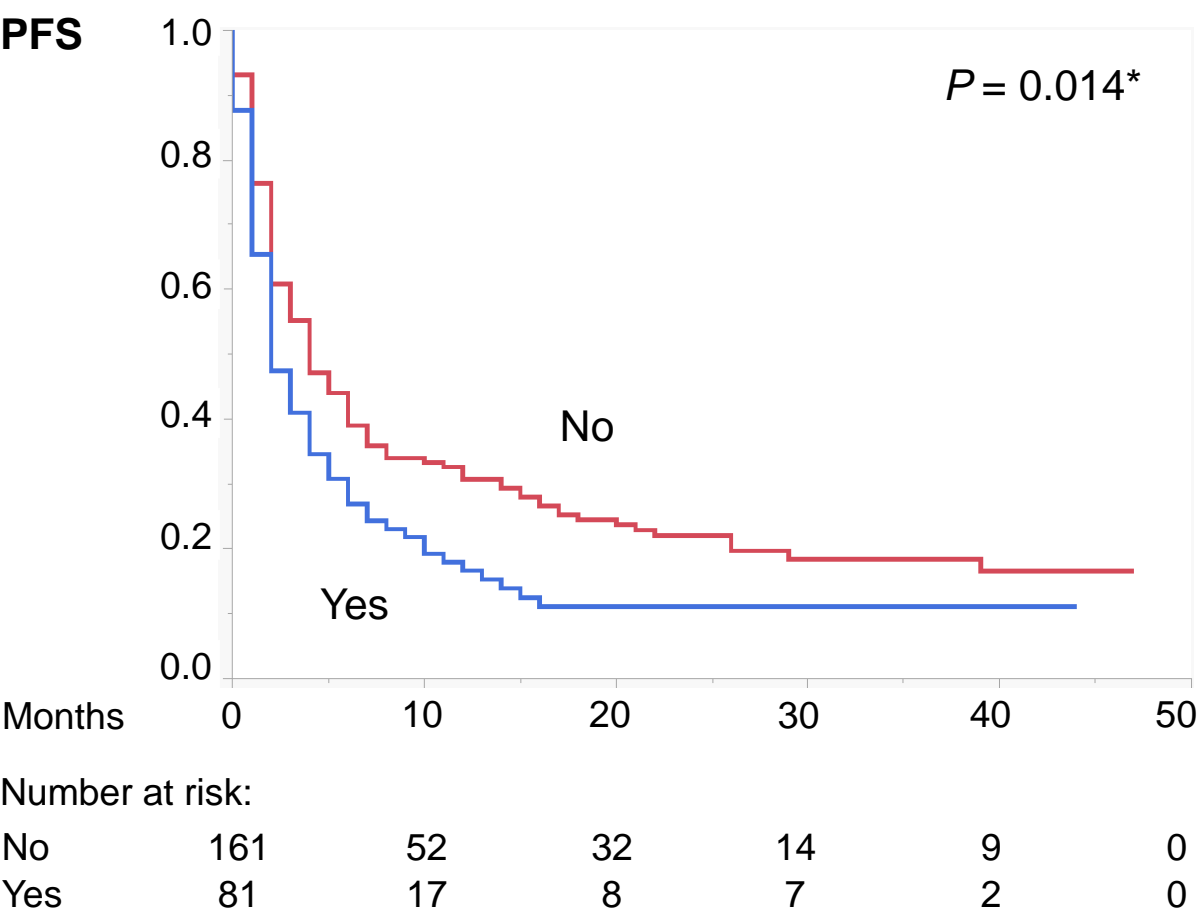

(D) PPIs

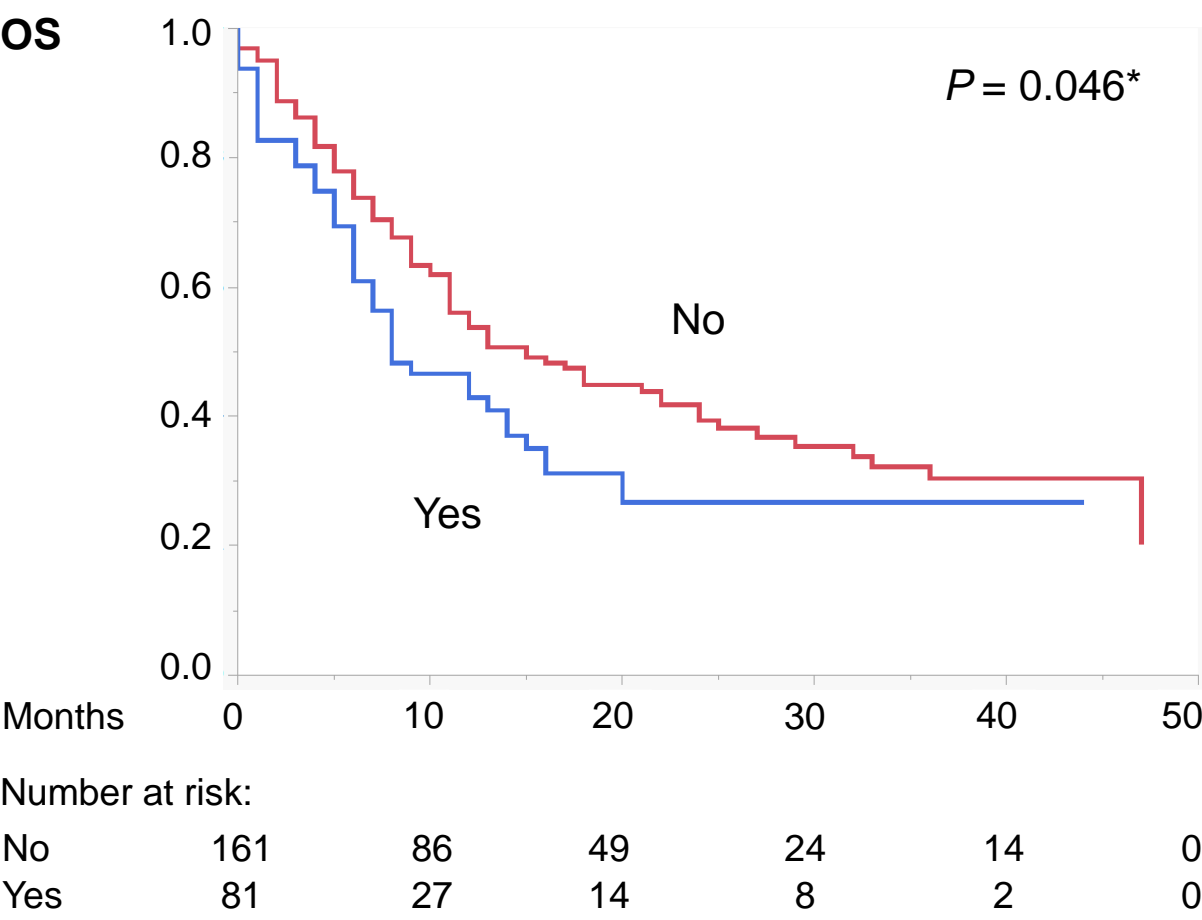

(E) Corticosteroids

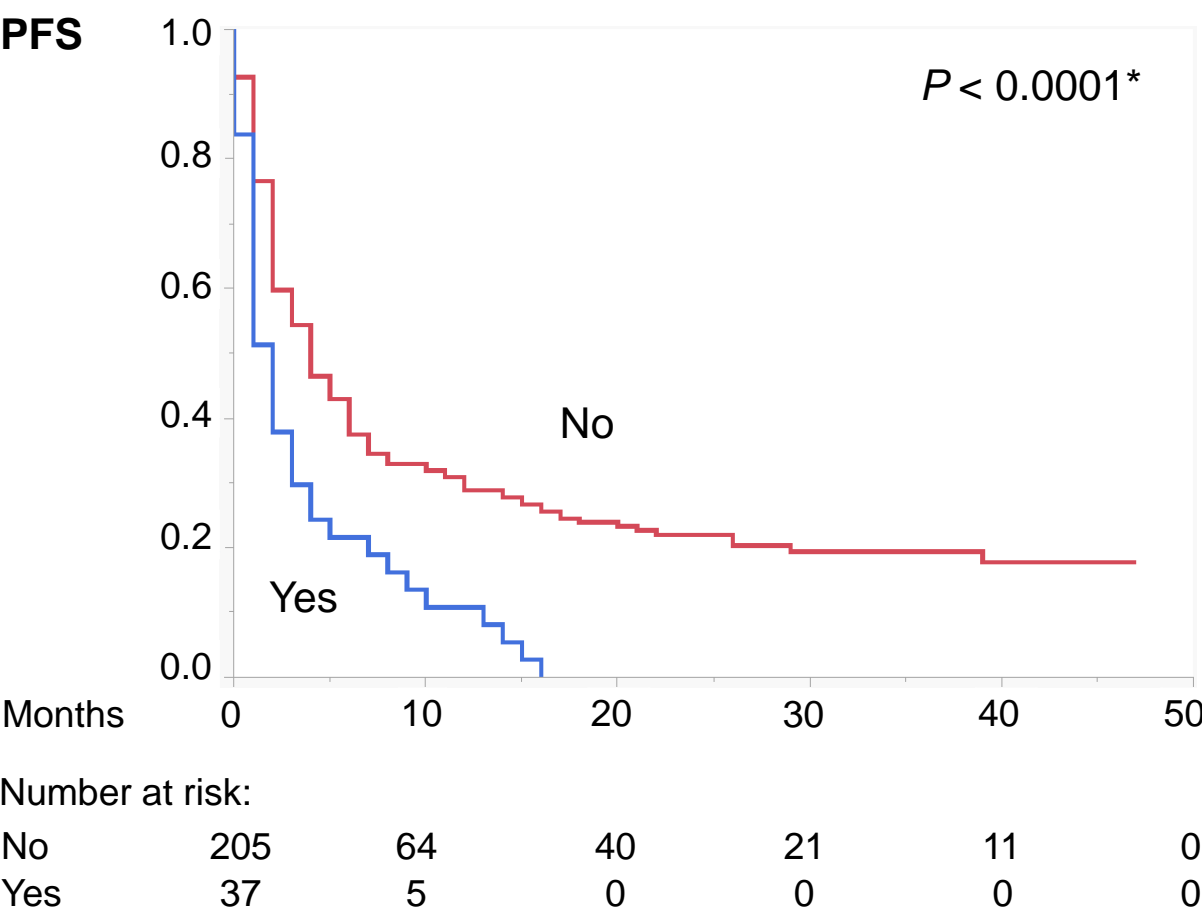

(F) Corticosteroids

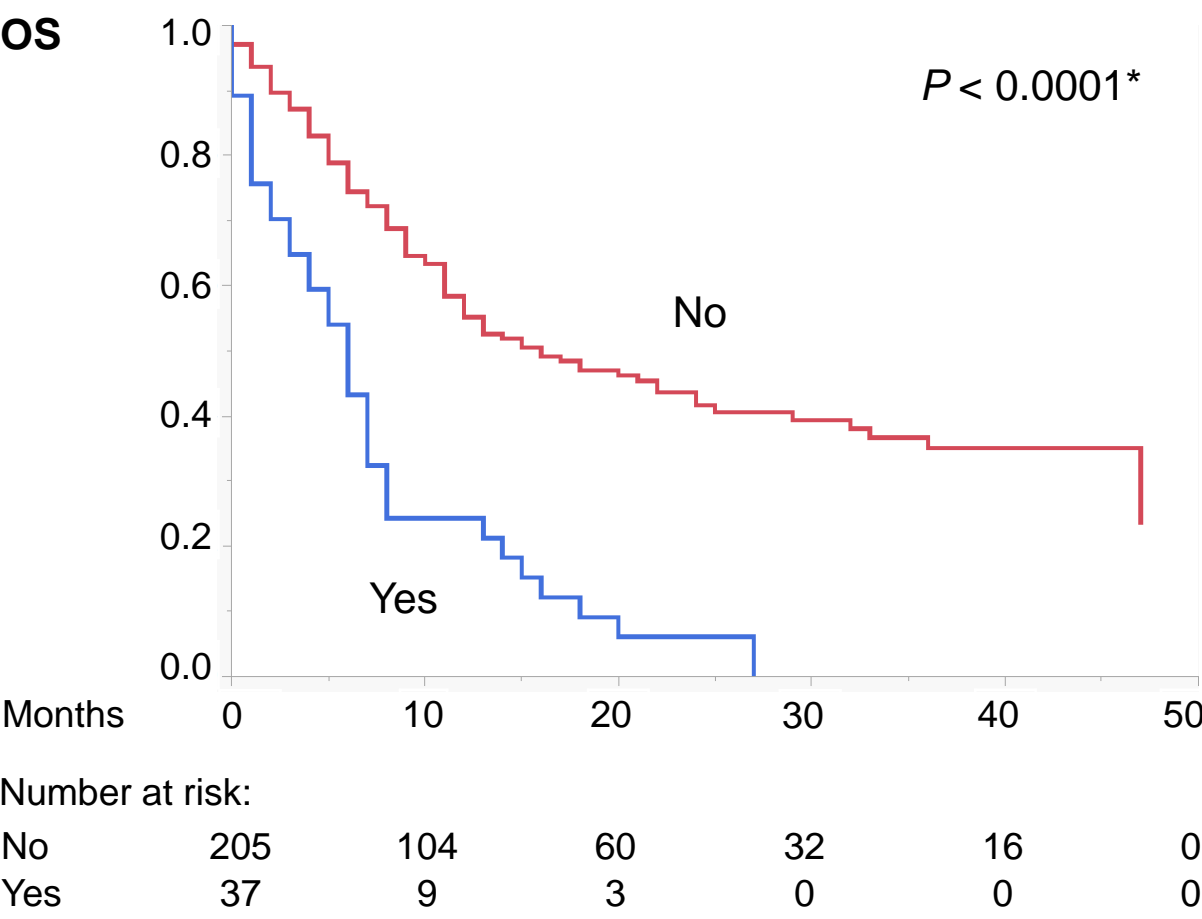

Supplement: Supplementary file 1 [file 1]

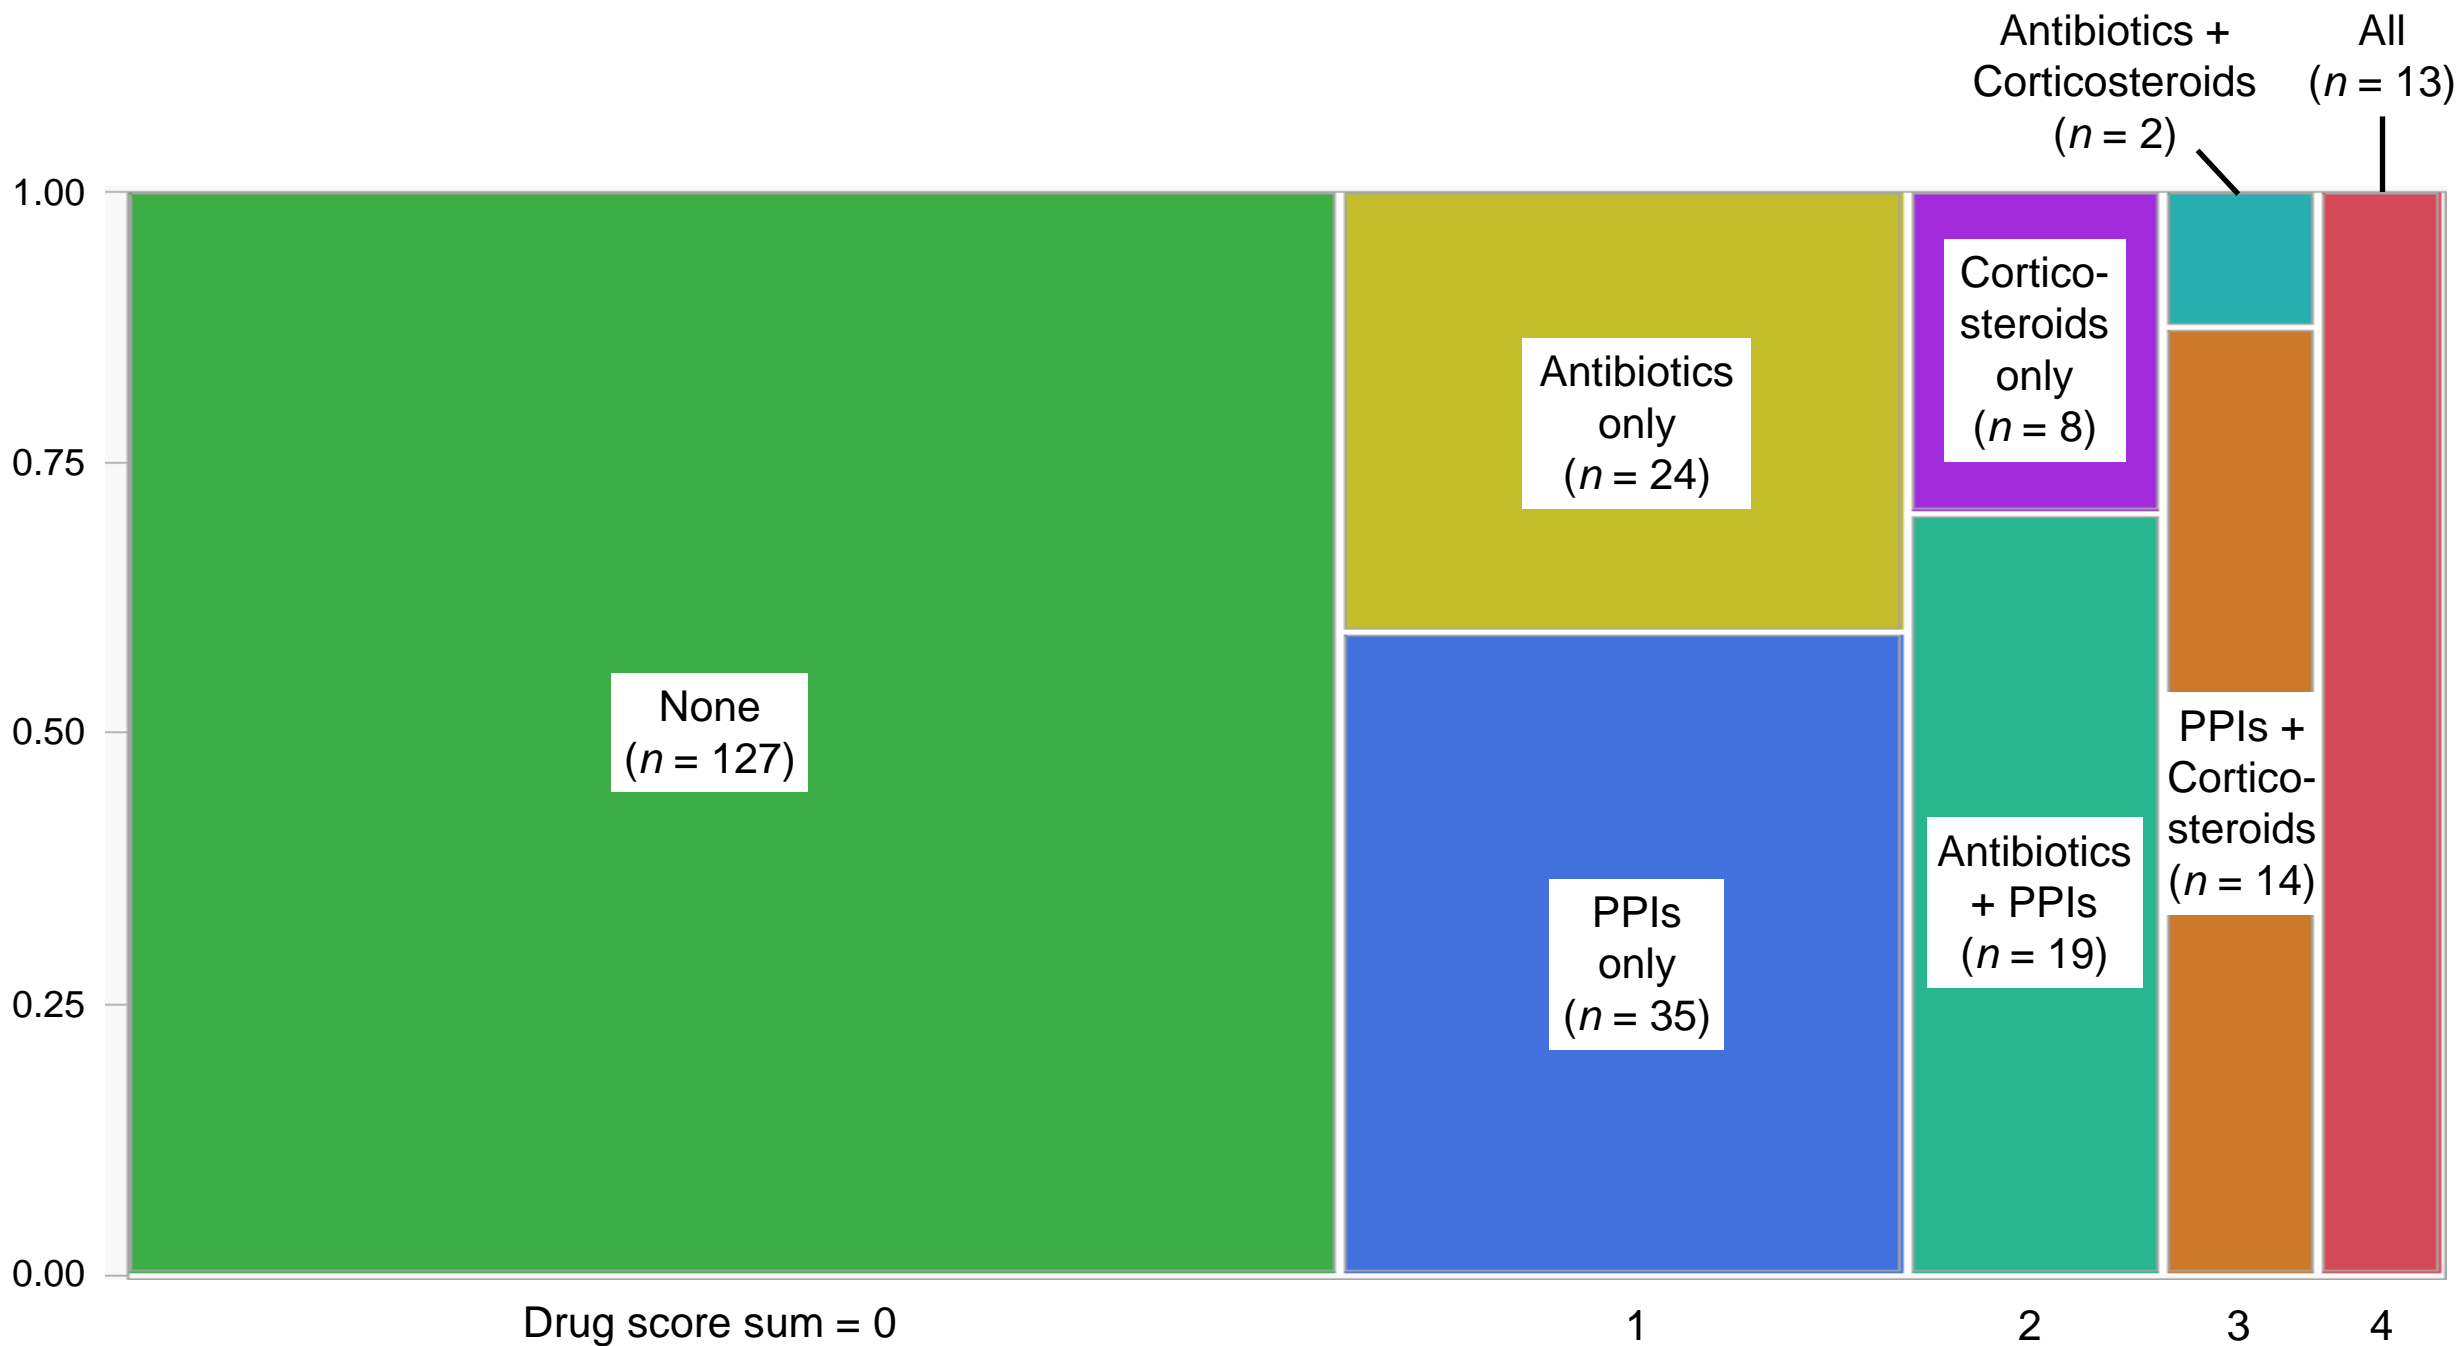

Supplement: Supplementary file 4 [file 1]
